# Supplementary material for: Industrial resin “INDION 130” modified with vanadyl cations as highly efficient heterogeneous catalyst for epoxidation of fatty compounds with TBHP as oxidant
Source: Royal Society of Chemistry journal article supplement (doi:10.1039/c5nj00744e), 2015-01-01

## Supporting Information

On

**Industrial resin “INDION 130” modified with vanadyl cations as highly efficient heterogeneous catalyst for epoxidation of fatty compounds with TBHP as oxidant**

Praveen K. Khatri,<sup>a</sup> Mounika Aila<sup>b</sup>, Savita Kaul<sup>b</sup> and Suman L. Jain<sup>a\*</sup>

<sup>a</sup>Chemical Sciences Division, CSIR-Indian Institute of Petroleum, Mohkampur, Dehradun-248005 (India)

<sup>b</sup>Biofuel Division, CSIR-Indian Institute of Petroleum, Mohkampur, Dehradun-248005 (India)

Fig. S1: EDX analysis of the INDION VO catalyst

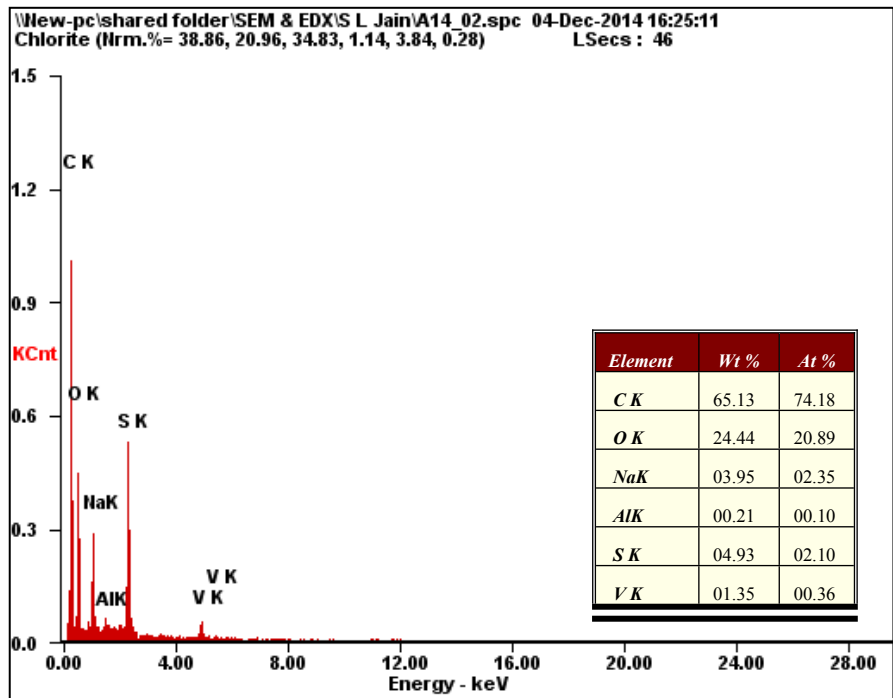

**Fig. S2:** FTIR spectra of: a) vegetable oil and b) epoxidized oil

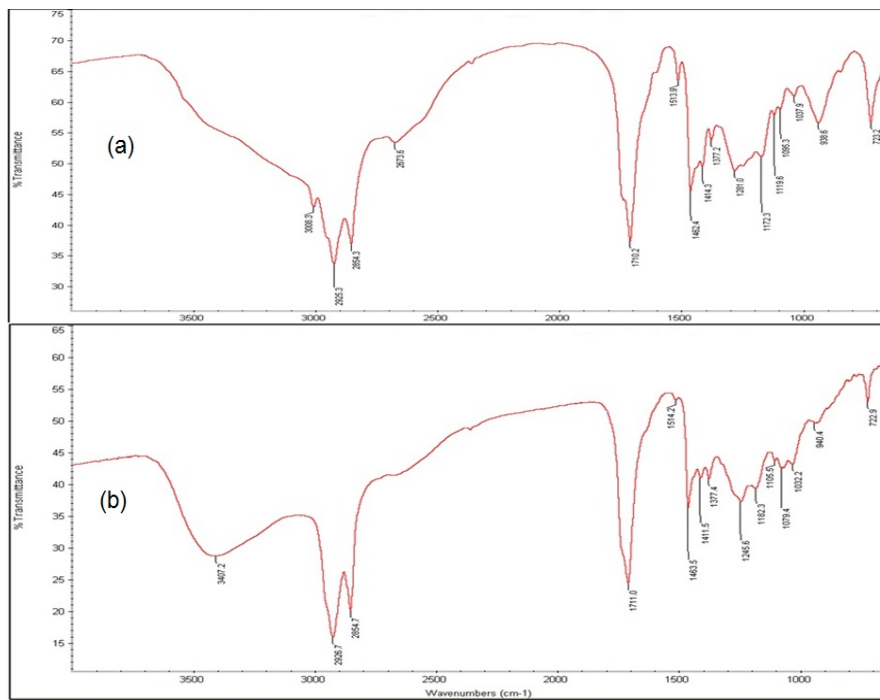

**Fig S3:**  $^1\text{H}$  NMR spectra of: a) vegetable oil and b) epoxidized oil

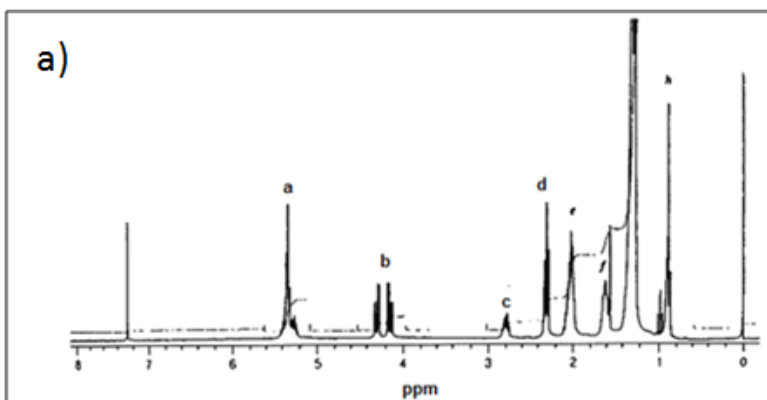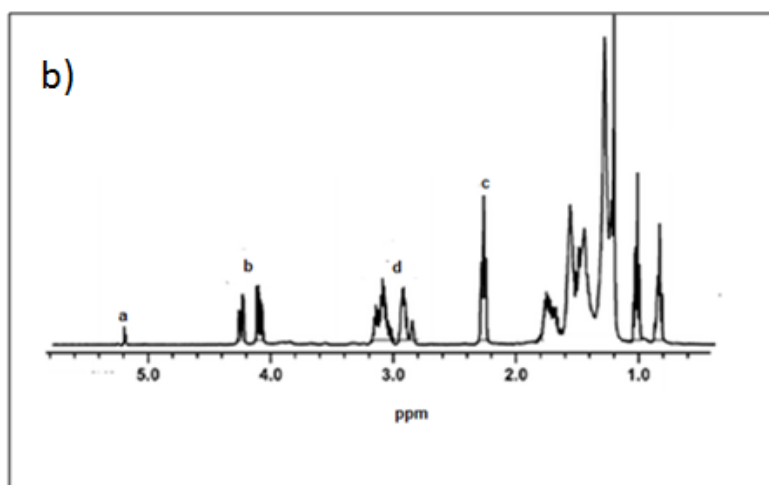

Supplement: c5nj00744e1.pdf [file c5nj00744e1.pdf]
